# Supplementary material
Source: publisher site journal article supplement (https://www.dovepress.com/article/461901)
Supplement: Supplementary file 1 [file get_supplementary_file.php]

**Supplement 1.**

**Readiness for Interprofessional Learning Scale (RIPLS) Questionnaire**

The purpose of this questionnaire is to examine the attitude of health care students and professionals towards interprofessional learning.

**Your name: (Develop your own ‘personal code’ by using the following formula):**

First 3 letters from your first name: _ _ _ Last 3 letters from your last name: _ _ _

**Year of birth:**

**Your discipline:**

**Your college: o COM o CON o COAMS**

**If you are from COAMS, what is your specialty?**

- Occupational Therapy
- Emergency Medical Services
- Radiological Sciences
- Respiratory Therapy
- Anesthesia Technology
- Cardiovascular Technology
- Clinical Laboratory Sciences
- Clinical Nutrition

**Have you completed the RIPLS questionnaire before?** o Yes o No

**If you answered yes to the previous** **question, please indicate how long ago you last completed the questionnaire:**

- - 1 – 3 months
  - 3 – 6 months
  - 6 – 12 months
  - 1 – 2 years
  - 2-3 years
  - 3+ years

# Have you had previous experience of interprofessional teaching? o Yes o No

**If you answered yes to the previous question, please give a very brief statement of what this IPE teaching was and any impact it may have had.**

**__________________________________________________________________________________________________________________________________________________________________**

# Please complete the following questionnaire.

|  | | **Strongly**  **agree** | **Agree** | **Undecided** | **Disagree** | **Strongly**  **disagree** |
| --- | --- | --- | --- | --- | --- | --- |
| Teamwork and collaboration | |  |  |  |  |  |
| **1** | Learning with other students will help me to become a more effective member of a healthcare team |  |  |  |  |  |
| **2** | Patients would ultimately benefit if health care students worked together to solve patient problems |  |  |  |  |  |
| **3** | Shared learning with other health care students will increase my ability to understand clinical problems |  |  |  |  |  |
| **4** | Communications skills should be learned with other healthcare students |  |  |  |  |  |
| **5** | Team-working skills are vital for all  healthcare students to learn |  |  |  |  |  |
| **6** | Shared learning will help me to understand my own professional limitations |  |  |  |  |  |
| **7** | Learning with healthcare students before qualification would improve relationships after qualification |  |  |  |  |  |
| **8** | Shared learning will help me think positively about other healthcare professionals |  |  |  |  |  |
| **9** | For small-group learning to work,  students need to respect and trust each other |  |  |  |  |  |
| Negative professional identity | |  |  |  |  |  |
| **10** | I don't want to waste my time learning with other healthcare students |  |  |  |  |  |
| **11** | It is not necessary for undergraduate health to learn together |  |  |  |  |  |
| **12** | Clinical problem solving skills can only be learned with students from my own college |  |  |  |  |  |
| Positive professional identity | |  |  |  |  |  |
| **13** | Shared learning with other health students will help me to communicate better with patients and other professionals |  |  |  |  |  |
| **14** | I would welcome the opportunity to work on small group projects with other healthcare students |  |  |  |  |  |
| **15** | Shared learning will help me clarify the nature of patients' problems |  |  |  |  |  |
| **16** | Shared learning before  qualification will help me become a better team worker |  |  |  |  |  |
| Roles and responsibility | |  |  |  |  |  |
| **17** | The function of nurses and therapists is mainly to provide support for doctors |  |  |  |  |  |
| **18** | I am not sure what my professional  role will be |  |  |  |  |  |
| **19** | I have to acquire much more knowledge and skill than other healthcare students |  |  |  |  |  |

**20. If you have any further comments regarding interprofessional** **education please provide them below**
